# Supplementary material for: The initial inoculation ratio regulates bacterial coculture interactions and metabolic capacity
Source: PubMed Central journal article supplement (PMC7852870; doi:10.1038/s41396-020-00751-7), 2020-09-04
Supplement: 41396_2020_751_MOESM1_ESM.pdf [file 41396_2020_751_MOESM1_ESM.pdf]

Supplementary files of

## The initial inoculation ratio regulates bacterial coculture interactions and metabolic capacity

Chun-Hui Gao<sup>1#</sup>, Hui Cao<sup>1#</sup>, Peng Cai<sup>1\*</sup>, Søren J. Sørensen<sup>2</sup>

<sup>1</sup>State Key Laboratory of Agricultural Microbiology, College of Resources and Environment, Huazhong Agricultural University, Wuhan 430070, China. <sup>2</sup>Section of Microbiology, Department of Biology, University of Copenhagen, Copenhagen, Denmark. \*Corresponding author: Peng Cai, cp@mail.hzau.edu.cn

#These authors contributed equally to this article.

The authors declare no competing financial interests.

**Table S1 List of 71 carbon sources**

| <b>Id</b> | <b>Name</b>                     | <b>Usage<sup>1</sup></b> | <b>Prefer<sup>2</sup></b> |
|-----------|---------------------------------|--------------------------|---------------------------|
| 2         | Dextrin                         | U1                       | EC                        |
| 3         | D-Maltose                       | U2                       | EC                        |
| 4         | D-Trehalose                     | U2                       | EC                        |
| 5         | D-Cellobiose                    | U1                       | None                      |
| 6         | Gentiobiosse                    | U1                       | EC                        |
| 7         | Sucrose                         | U1                       | None                      |
| 8         | D-Turanose                      | U1                       | None                      |
| 9         | Stachyose                       | U1                       | None                      |
| 10        | D-Raffinose                     | U1                       | None                      |
| 11        | $\alpha$ -D-Lactose             | U1                       | None                      |
| 12        | D-Melibiose                     | U1                       | EC                        |
| 13        | $\beta$ -Methyl-D-Glucoside     | U1                       | None                      |
| 14        | D-Salicin                       | U1                       | None                      |
| 15        | N-Acetyl-D-Glucosamine          | U2                       | None                      |
| 16        | N-Acetyl- $\beta$ -Dmannosamine | U1                       | None                      |
| 17        | N-Acetyl-D-Galactosamine        | U1                       | None                      |
| 18        | N-AcetylNeuraminic Acid         | U2                       | EC                        |
| 19        | $\alpha$ -D-Glucose             | U3                       | PP                        |
| 20        | D-Mannose                       | U2                       | PP                        |
| 21        | D-Fructose                      | U2                       | EC                        |
| 22        | D-Galactose                     | U1                       | EC                        |
| 23        | 3-MethylGlucose                 | U1                       | None                      |
| 24        | D-Fucose                        | U1                       | PP                        |
| 25        | L-Fucose                        | U2                       | EC                        |

---

|           |                           |    |      |
|-----------|---------------------------|----|------|
| <b>26</b> | L-Rhamnose                | U1 | EC   |
| <b>27</b> | Inosine                   | U2 | None |
| <b>28</b> | D-Sorbitol                | U1 | EC   |
| <b>29</b> | D-Mannitol                | U2 | EC   |
| <b>30</b> | D-Arabitol                | U1 | None |
| <b>31</b> | myo-Inositol              | U1 | None |
| <b>32</b> | Glycerol                  | U1 | None |
| <b>33</b> | D-Glucose-6-PO4           | U2 | EC   |
| <b>34</b> | D-Fructose-6-PO4          | U2 | EC   |
| <b>35</b> | D-Aspartic Acid           | U1 | None |
| <b>36</b> | D-Serine                  | U2 | EC   |
| <b>37</b> | Gelatin                   | U1 | None |
| <b>38</b> | Glycyl-L-Prolin           | U1 | EC   |
| <b>39</b> | L-Alanine                 | U3 | PP   |
| <b>40</b> | L-Arginine                | U3 | PP   |
| <b>41</b> | L-Aspartic Acid           | U3 | PP   |
| <b>42</b> | L-Glutamic                | U3 | PP   |
| <b>43</b> | L-Histidine               | U3 | PP   |
| <b>44</b> | L-Pyroglutamic            | U3 | PP   |
| <b>45</b> | L-Serine                  | U1 | None |
| <b>46</b> | Pectin                    | U1 | EC   |
| <b>47</b> | D-Galacturonic Acid       | U3 | PP   |
| <b>48</b> | L-Galactonic Acid Lactone | U2 | EC   |
| <b>49</b> | D-Gluconic                | U2 | PP   |
| <b>50</b> | D-Glucuronic              | U3 | PP   |
| <b>51</b> | Glucuronamid              | U1 | PP   |
| <b>52</b> | Mucic Acid                | U3 | PP   |

---

|           |                                   |    |      |
|-----------|-----------------------------------|----|------|
| <b>53</b> | Quinic Acid                       | U3 | PP   |
| <b>54</b> | D-Saccharic                       | U3 | PP   |
| <b>55</b> | p-Hydroxy-Phenylacetic Acid       | U1 | PP   |
| <b>56</b> | Methyl Pyruvate                   | U1 | PP   |
| <b>57</b> | D-Lactic Acid Methyl Ester        | U1 | None |
| <b>58</b> | L-Lactic Acid                     | U3 | PP   |
| <b>59</b> | Citric Acid                       | U3 | PP   |
| <b>60</b> | $\alpha$ -Keto-Glutaric Acid      | U1 | PP   |
| <b>61</b> | D-Malic Acid                      | U1 | None |
| <b>62</b> | L-Malic Acid                      | U3 | PP   |
| <b>63</b> | Bromo-Succinic                    | U1 | PP   |
| <b>64</b> | Tween 40                          | U1 | None |
| <b>65</b> | $\gamma$ -Amino-Butyric Acid      | U3 | PP   |
| <b>66</b> | $\alpha$ -Hydroxy-Butyric Acid    | U1 | None |
| <b>67</b> | $\beta$ -Hydroxy-D,L-Butyric Acid | U1 | PP   |
| <b>68</b> | $\alpha$ -Keto-Butyric Acid       | U1 | None |
| <b>69</b> | Acetoacetic Acid                  | U1 | PP   |
| <b>70</b> | Propionic Acid                    | U1 | PP   |
| <b>71</b> | Acetic Acid                       | U1 | None |
| <b>72</b> | Formic Acid                       | U1 | None |

Note: <sup>1</sup> Carbon usage groups were determined by hierarchical clustering of CUE profiles of all cultures (see Figure 4 for more information). <sup>2</sup> Carbon preferences were determined by comparing the CUE of monocultures as follows (see also Figure 3). EC, *Escherichia coli* K-12 preferred carbon source; PP, *Pseudomonas putida* KT2440 preferred carbon source; None: no preference.

# Figure S1

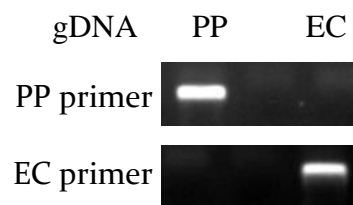

Figure S1. Specificity of species-specific primers. The PCR experiments were performed with *E. coli* and *P. putida* specific primers (left) and their genomic DNA (top), respectively. EC, *Escherichia coli* K-12; PP, *Pseudomonas putida* KT2440.

# Figure S2

Preference █ None █ *E. coli* █ *P. putida*

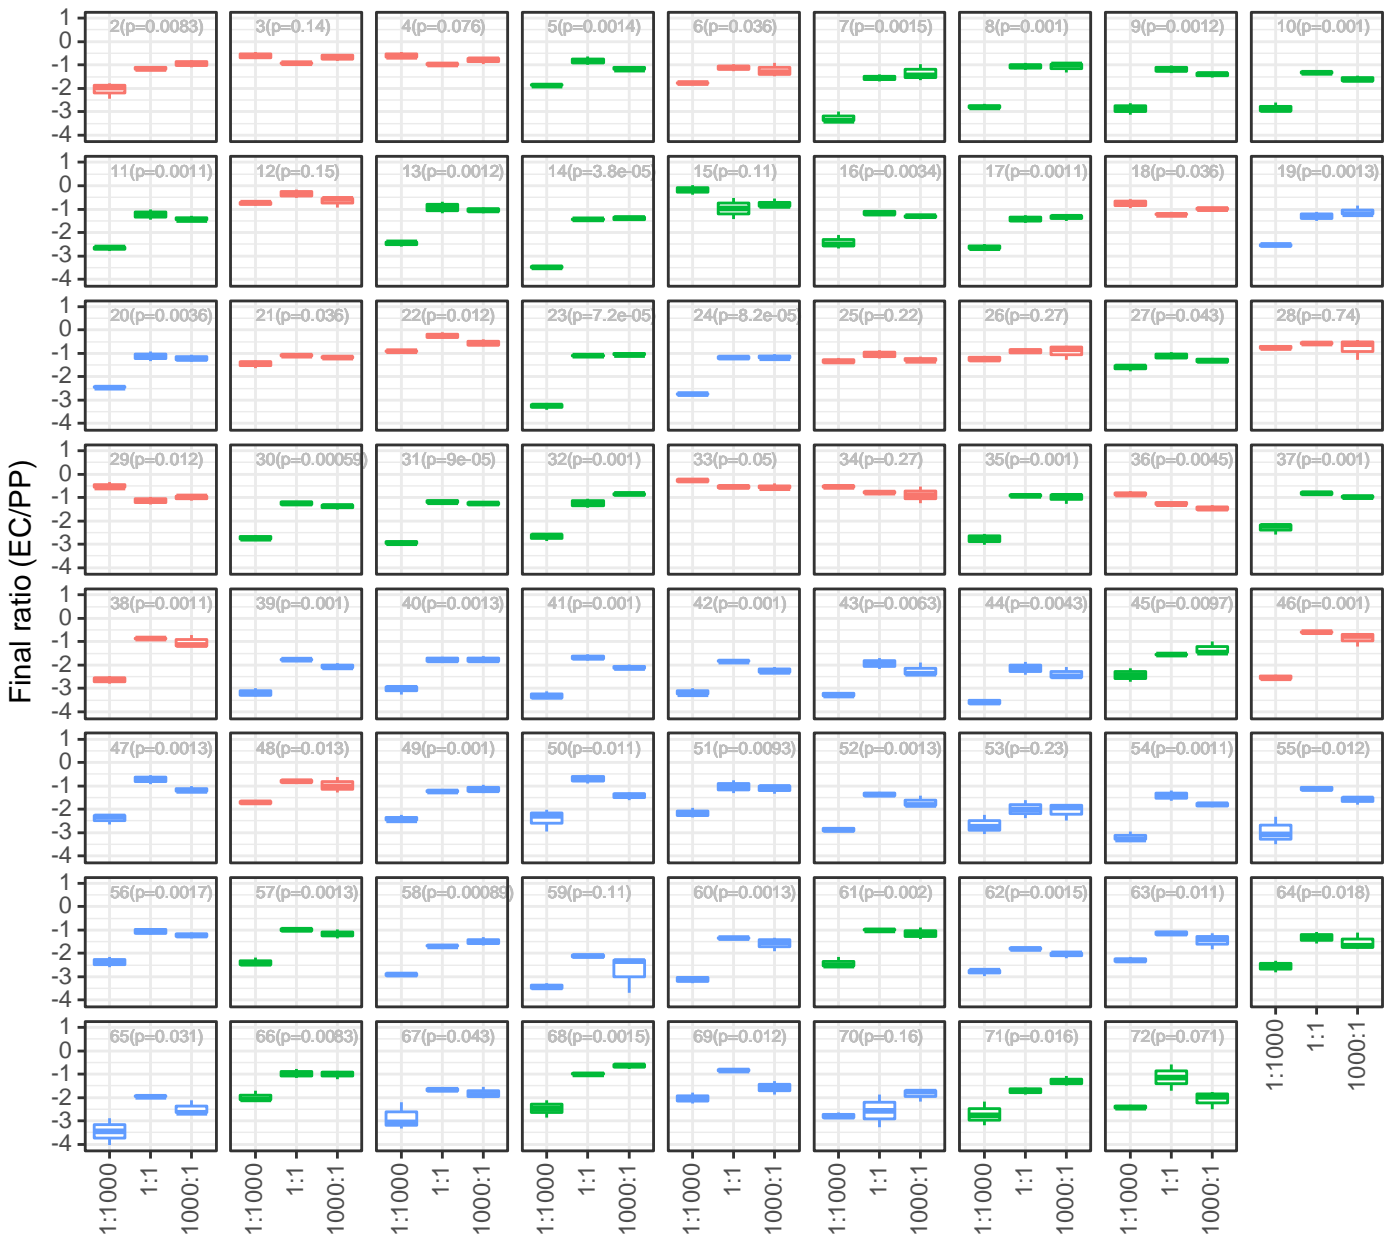

Figure S2. Final ratio of all cocultures in 71 carbon sources (left to right, top to down, carbon id from 2 to 72). The adjusted p-value (ANOVA) were showed on the top of each subplot. The x-axis indicates coculture initial ratios (*E. coli*/*P. putida*), and the y-axis is the final ratio (log<sub>10</sub>-transformed). Green, none preferred carbon sources; Red, *E. coli* preferred carbon sources; Blue, *P. putida* preferred carbon sources.

# Figure S3

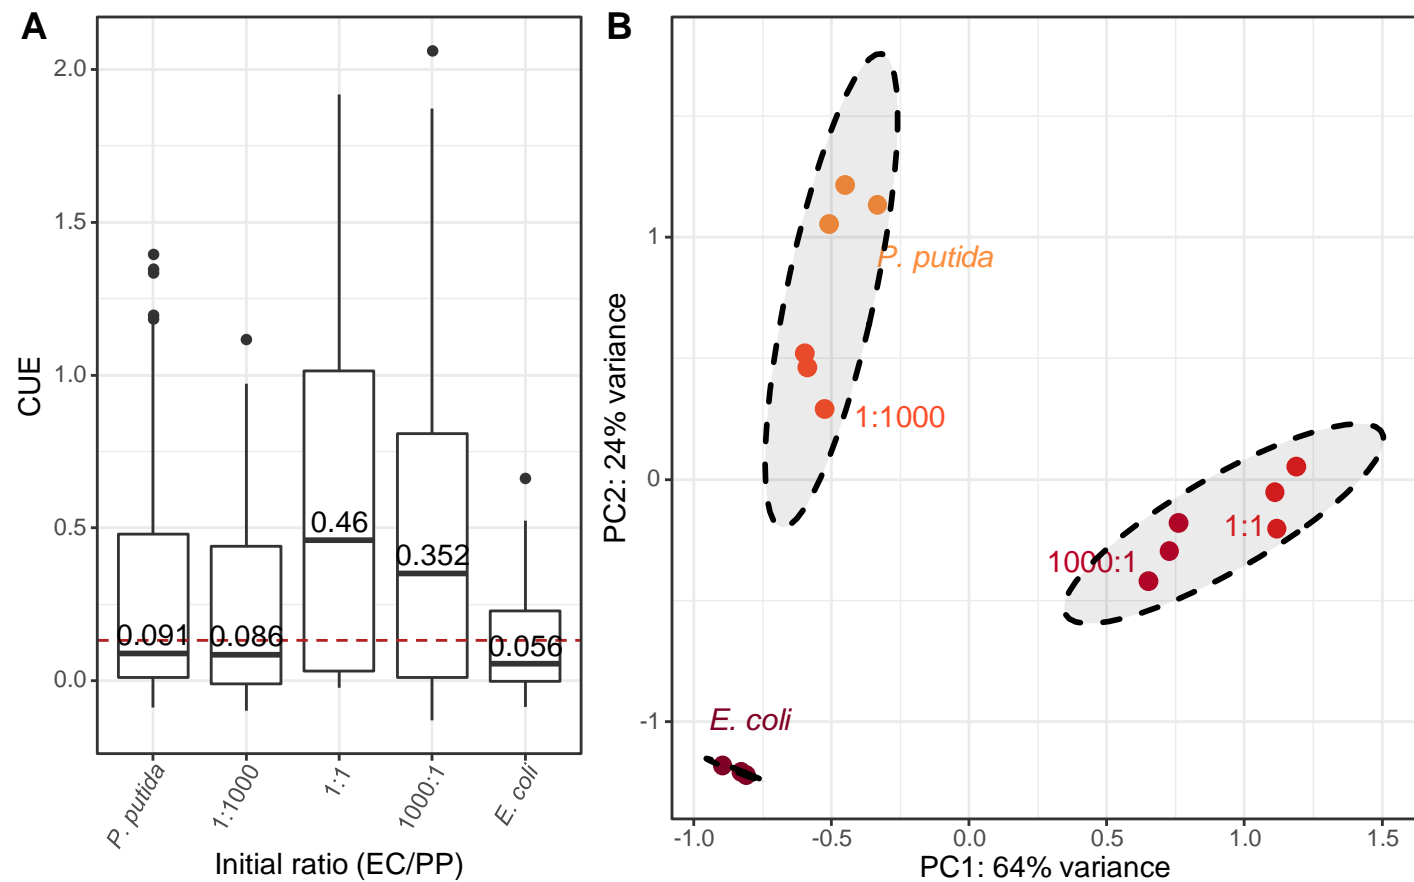

Figure S3. The carbon usage profiles of two monocultures (*E.coli* and *P. putida*) and three cocultures (1:1000, 1:1, and 1000:1). (A) boxplot. Number shows the median of each culture, and horizontal line shows the mean of all cultures. (B) PCA analysis of carbon usage profiles. Ellipses represent the 95% confidence interval of clustering.

# Figure S4

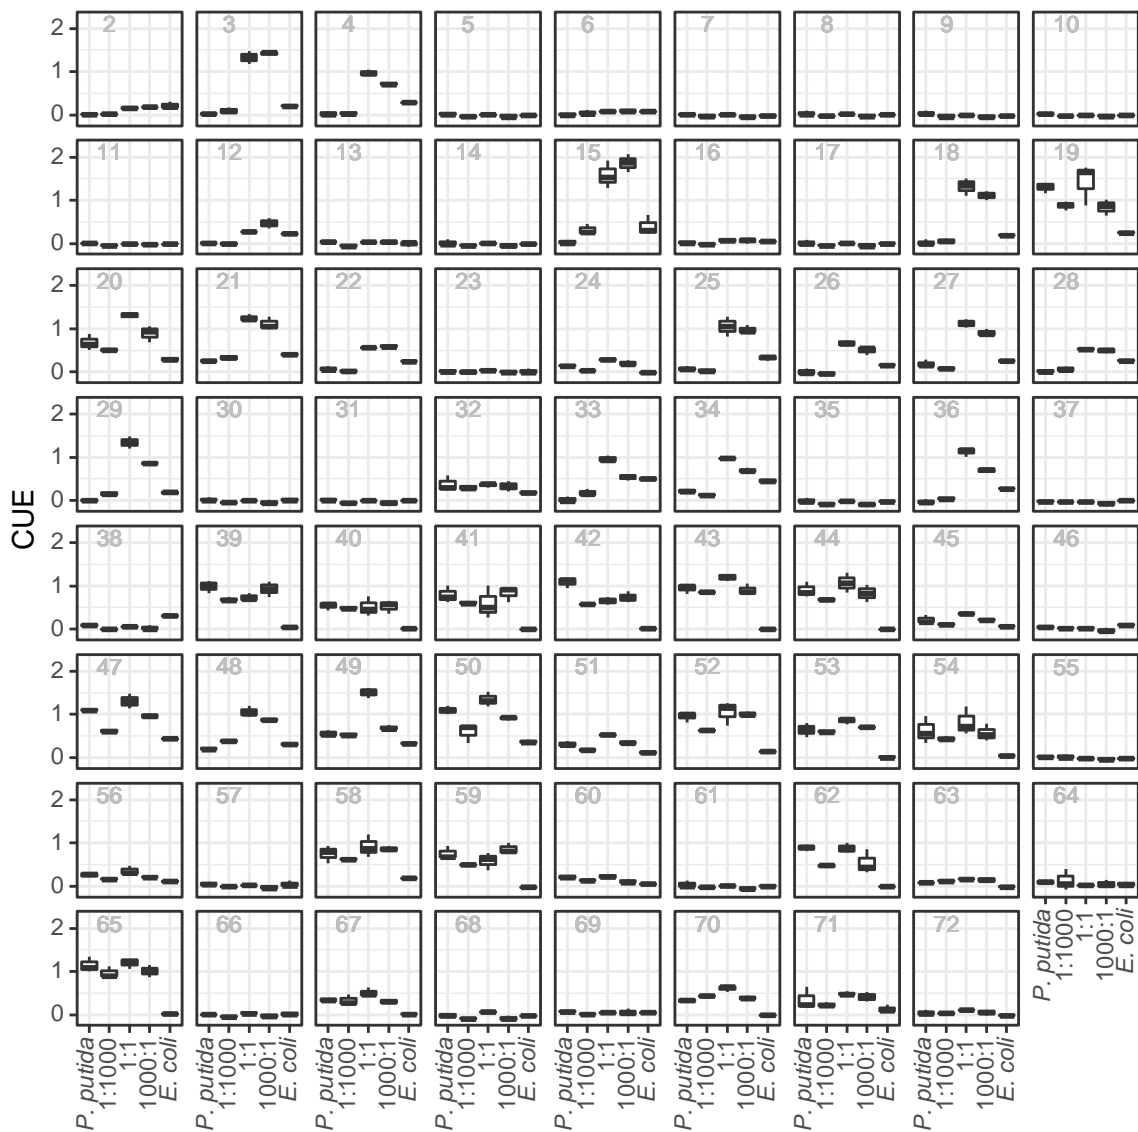

Figure S4. The CUE of mono- and cocultures in 71 carbon sources (left to right, top to down, carbon id from 2 to 72). The x-axis indicates culture conditions (there are a total of 5 culture conditions: *P. putida*, the “1:1000” coculture ; the “1:1” coculture; the “1000:1” coculture and *E. coli* ), and the y-axis indicates CUE.
